# Supplementary material for: Aficamten and Cardiopulmonary Exercise Test Performance: A Substudy of the SEQUOIA-HCM Randomized Clinical Trial
Source: PubMed Central journal article supplement — JAMA Cardiol. 2024 Sep 4;9(11):990–1000. doi: 10.1001/jamacardio.2024.2781 (PMC11375526; doi:10.1001/jamacardio.2024.2781), 2024-09-04
Supplement: jamacardiol-e242781-s002.pdf [file jamacardiol-e242781-s002.pdf]

## STATISTICAL ANALYSIS PLAN

### A Double-blind, Randomized, Placebo-controlled, Multicenter Study to Assess the Efficacy and Safety of Aficamten in Patients with Obstructive Hypertrophic Cardiomyopathy

**Protocol Number:** CY 6031

**Version:** V 1.0

**Date:** 14/11/2023

**Authors:** Gregory D. Lewis, Matthew M.Y. Lee

Does this Supplemental Statistical Analysis Plan document any analysis with the objective of claiming pre-specification?

Yes

No

| <b>Version Number</b> | <b>Date<br/>(DDMMYYYY)</b> | <b>Summary of Changes,<br/>including rationale for changes</b> |
|-----------------------|----------------------------|----------------------------------------------------------------|
| Original (v1.0)       | 14/11/2023                 |                                                                |
| Amendment 1 (v2.0)    |                            |                                                                |
| Amendment 2 (v3.0)    |                            |                                                                |

## Table of Contents

|                                                           |                                     |
|-----------------------------------------------------------|-------------------------------------|
| <a href="#">Table of Abbreviations</a> .....              | 3                                   |
| <a href="#">1. INTRODUCTION</a> .....                     | 4                                   |
| <a href="#">2. OBJECTIVES</a> .....                       | 4                                   |
| <a href="#">3. ANALYSIS SUBSET(S)</a> .....               | 5                                   |
| <a href="#">4. DEFINITIONS</a> .....                      | 5                                   |
| <a href="#">5. COVARIATES AND SUBGROUPS</a> .....         | <b>Error! Bookmark not defined.</b> |
| <a href="#">5.1 Covariates</a> .....                      | <b>Error! Bookmark not defined.</b> |
| <a href="#">5.2 Subgroups</a> .....                       | <b>Error! Bookmark not defined.</b> |
| <a href="#">6. ENDPOINT CATEGORIES AND ANALYSES</a> ..... | 11                                  |
| <a href="#">6.1 Endpoints</a> .....                       | <b>Error! Bookmark not defined.</b> |
| <a href="#">7. KEY REFERENCES</a> .....                   | 11                                  |

## Table of Abbreviations

|                    |                                                                                                                    |
|--------------------|--------------------------------------------------------------------------------------------------------------------|
| BL                 | baseline                                                                                                           |
| BP                 | Blood pressure                                                                                                     |
| CPET               | cardiopulmonary exercise testing                                                                                   |
| CSR                | Clinical Study Report                                                                                              |
| EQ-5D-5L           | EuroQol 5-dimension 5-level instrument                                                                             |
| HCM                | hypertrophic cardiomyopathy                                                                                        |
| HR                 | heart rate                                                                                                         |
| HRR                | heart rate recovery                                                                                                |
| hs-cTnI            | high sensitivity cardiac troponin I                                                                                |
| KCCQ-CSS           | Kansas City Cardiomyopathy Questionnaire-Clinical Summary Score                                                    |
| LVEF               | left ventricular ejection fraction                                                                                 |
| LVOT-G             | left ventricular outflow tract gradient                                                                            |
| METS               | metabolic equivalent of task                                                                                       |
| NT-proBNP          | N-terminal pro-B-type natriuretic peptide                                                                          |
| NYHA               | New York Heart Association                                                                                         |
| PETCO <sub>2</sub> | end-tidal partial pressure of carbon dioxide                                                                       |
| RER                | respiratory exchange ratio                                                                                         |
| SAP                | Statistical Analysis Plan                                                                                          |
| SEQUOIA-HCM        | Safety, Efficacy, and Quantitative Understanding of Obstruction Impact of Aficamten in Hypertrophic Cardiomyopathy |
| SSAP               | Supplemental Statistical Analysis Plan                                                                             |
| VAT                | ventilatory anaerobic threshold                                                                                    |
| VCO <sub>2</sub>   | carbon dioxide output                                                                                              |
| VE                 | minute ventilation                                                                                                 |
| VO <sub>2</sub>    | oxygen uptake                                                                                                      |
| VO <sub>2</sub> RD | VO <sub>2</sub> recovery delay                                                                                     |
| W24                | week 24                                                                                                            |

## **INTRODUCTION**

This Supplemental Statistical Analysis Plan (SSAP) outlines the statistical analyses to be performed beyond the analyses described within the SAP version 1.0 for data collected within the scope of Cytokinetics protocol CY 6031, titled “A Phase 3, Multi-Center, Randomized, Double-blind, Placebo-controlled Trial to Evaluate the Efficacy and Safety of CK-3773274 in Adults with Symptomatic Hypertrophic Cardiomyopathy and Left Ventricular Outflow Tract Obstruction.” The objective of this SSAP is to prespecify non-Clinical Study Report (CSR) related analyses intended to provide supportive information around the effect of Aficamten on comprehensive measures of exercise capacity on cardiopulmonary exercise testing beyond peak oxygen uptake.

## OBJECTIVES

To evaluate the effect of treatment with aficamten compared with placebo on comprehensive measures of exercise capacity on cardiopulmonary exercise testing beyond peak oxygen uptake during the course of study CY 6031.

## ANALYSIS SUBSET(S)

By default, all secondary analyses will include all FAS patients (i.e. those included in the primary reporting of the SEQUOIA-HCM trial).

*Please include any additional inclusion/exclusion criteria required for this specific analysis. Leave blank if no additional exclusions required.*

Prespecified subgroups for the analysis are listed in [Section 4.2](#).

## DEFINITIONS

All definitions of interest used in these analyses (definitions related to study endpoints, study time points, demographics and baseline related and other study related definitions) will match those described in the study CY 6031 SAP.

## ENDPOINT CATEGORIES AND ANALYSES

The objective/s of these analyses are to:

- Compare treatment groups within the subgroup categories.
- Compare specific subgroups with one another regardless of the treatment arm assigned.
- Both
- Neither (objective: \_\_\_\_\_)

## Endpoints

- Main Endpoint: Change in the composite of two Z-scores of CPET parameters from baseline to Week 24: - peak  $\text{VO}_2$  (maximal exercise capacity) -  $\text{VE}/\text{VCO}_2$  slope (sub-maximal capacity – independent of volitional effort)
- Other Endpoints:
  - Change in the following peak exercise parameters in aficamten vs placebo from BL to W24:
    - Peak  $\text{VO}_2$
    - Percent predicted peak  $\text{VO}_2$
    - Peak METS
    - Peak circulatory power
    - Peak exercise time
    - Peak RER
    - Peak  $\text{PETCO}_2$
    - Change in heart rate (resting to peak)
  - Change in the following sub-maximal exercise parameters in aficamten vs placebo from BL to W24
    - $\text{VE}/\text{VCO}_2_{\text{pre-VATslope}}$
    - $\text{VE}/\text{VCO}_2_{\text{overall-slope}}$
    - Ventilatory power
    - Ventilatory anaerobic threshold
    - $\text{VO}_2/\text{workload slope}$
    - Oxygen uptake efficiency slope ( $\text{VO}_2/\log\text{VE slope}$ )
    - $\text{VO}_2$  recovery kinetics
    - $\text{O}_2$  pulse plateau (y/n)
    - $\text{O}_2$  pulse plateau gradient

- Relationships between main endpoint as well as both peak and non-peak exercise parameters and:
  - i. Change in health status (determined by KCCQ) from BL to W24
  - ii. Change in symptoms determined by NYHA from BL to W24
  - iii. Change in NT-proBNP from BL to W24
  - iv. Change in troponin level from BL to W24
  - v. Change in Rest and Valsalva LVOT-G from BL to W24
  - vi. Change in LAVI from BL to W24
- **RECOVERY MEASURES**
  - a. Heart rate recovery (HRR) at 1 minute and 2 minutes
  - b. VO<sub>2</sub> recovery kinetics (VO<sub>2</sub>RD)
  - c. T<sub>1/2</sub> VO<sub>2</sub> (time for VO<sub>2</sub> to decrease to 50% of peak VO<sub>2</sub> adjusted for resting VO<sub>2</sub>)
- **Threshold analysis between placebo and aficamten (reference to KCCQ approach) – responder analysis - proportion achieving the following between BL to W24:**
  - a. Improvement of peak VO<sub>2</sub> by 1.0, 1.5, 2.0, 3.0, 4.0 and 5.0 mL/kg/min
  - b. Deterioration of peak VO<sub>2</sub> by 1.0, 1.5, 2.0, 3.0, 4.0 and 5.0 mL/kg/min
  - c. Improvement of percent predicted peak VO<sub>2</sub> by 5, 10, 15, 20 and 25%
  - d. Deterioration of percent predicted peak VO<sub>2</sub> by 5, 10, 15, 20 and 25%

## **COVARIATES AND SUBGROUPS**

### **Baseline Covariates**

*By default, baseline variables shown in Table 1 will mirror those presented in the primary SEQUOIA-HCM manuscript:*

**Age, years**

**Sex, n (%)**

**Female**

**Male**

**Race, n (%)**

**Asian**

**White**

**Black or African American**

**etc. (race category can be sorted by descending order of % in overall**

**Region, n (%)**

**China**

**North America**

**Rest of World**

**Hypertrophic cardiomyopathy genetic testing performed, n (%)**

**Pathogenic or variant of uncertain significance**

**Medical history, n (%)**

**Family history of hypertrophic cardiomyopathy**

**Family history of HCM and/or known HCM-causing gene mutation**

**Time since HCM diagnosis, years**

**Myocardial infarction**

**Coronary artery disease**

**Paroxysmal atrial fibrillation**

**Permanent atrial fibrillation**

**Cardiac syncope**

**Sustained ventricular tachycardia**

**Ventricular fibrillation**

**Hypertension**



**Torsades de Pointes**

**Background Hypertrophic cardiomyopathy therapy, n (%)**

**Beta-blocker**

**Calcium channel blocker**

**Disopyramide**

**Implantable cardioverter-defibrillator, n (%)**

**Body-mass index, kg/m<sup>2</sup>, mean (SD)**

**Resting heart rate, beats per min**

**Systolic blood pressure, mm Hg**

**Diastolic blood pressure, mm Hg**

**NYHA functional class, n (%)**

**Class II**

**Class III**

**CPET parameters**

**CPET modality**

**Peak VO<sub>2</sub>, mL/kg per min**

**Peak RER**

**% predicted peak VO<sub>2</sub>**

**Chronotropic incompetence (defined as inability to achieve 80% of predicted peak heart rate during maximal exercise)**

**KCCQ-CSS**

**NT-proBNP, geometric mean, ng/L (CV%)**

**High-sensitivity cardiac troponin I, geometric mean, ng/L (CV%)**

**Echocardiographic parameters**

**LVEF, %**

**LVOT-G, rest, mm Hg**

**LVOT-G, Valsalva, mm Hg**

Maximum left ventricular wall thickness, mm

Left atrial volume index, mL/m<sup>2</sup>

Left ventricular mass index, g/m<sup>2</sup>

*Please include any additional variables required for this specific analysis. Leave blank if no additional baseline variables are required.*

### **Subgroups**

Prespecified subgroups for the analysis include, but are not limited to:

**Subgroups already delineated in the primary SAP include:**

- Sex
- Age group
- Baseline body mass index
- Baseline NYHA Class
- Baseline KCCQ-CSS
- Baseline LVEF
- NT-proBNP
- CPET modality
- Baseline peak VO<sub>2</sub>
- Beta-blocker use
- Baseline resting LVOT-G (continuous)
- Baseline Valsalva LVOT-G (continuous)
- Sarcomeric gene mutation status (pathogenic or variant of uncertain significance, and non-disease causing or none)

**Additional Subgroups to be included in this analysis:**

- Septal wall thickness

- Left atrial volume index
- Mitral regurgitant jet:left atrial area ratio (mitral regurgitation severity)
- LV end-diastolic volume
- LV end-systolic volume
- Valsalva LVOT gradient
- Left ventricular ejection fraction
- Plasma hsTroponin I concentration
- Blood pressure
- Heart rate
- Non-dihydropyridine calcium-channel blocker use
- Disopyramide use
- Chronotropic incompetence y/n (*as defined by inability to achieve 80% of predicted peak heart rate during maximal exercise*)

## ENDPOINT CATEGORIES AND ANALYSES

The objective/s of these analyses are to:

- Compare treatment groups within the subgroup categories.
- Compare specific subgroups with one another regardless of the treatment arm assigned.
- Both
- Neither (objective: \_\_\_\_\_)

## KEY REFERENCES

1. Wheeler MT, Olivotto I, Elliott PM, Saberi S, Owens AT, Maurer MS, Masri A, Sehnert AJ, Edelberg JM, Chen YM, Florea V, Malhotra R, Wang A, Oręziak A, Myers J. Effects of

Mavacamten on Measures of Cardiopulmonary Exercise Testing beyond Peak Oxygen Consumption: A Secondary Analysis of the EXPLORER-HCM Randomized Trial. *JAMA Cardiol.* 2023;8:240–247.

2. Tian Z, Li L, Li X, Wang J, Zhang Q, Li Z, Peng D, Yang P, Ma W, Wang F, Jin W, Cheng X, Sun J, Fu Y, Lyu C, Zhang S. Effect of Mavacamten on Chinese Patients With Symptomatic Obstructive Hypertrophic Cardiomyopathy. *JAMA Cardiol.* 2023;
3. Coats CJ, Pavlou M, Watkinson OT, Protonotarios A, Moss L, Hyland R, Rantell K, Pantazis AA, Tome M, McKenna WJ, Frenneaux MP, Omar R, Elliott PM. Effect of Trimetazidine Dihydrochloride Therapy on Exercise Capacity in Patients with Nonobstructive Hypertrophic Cardiomyopathy: A Randomized Clinical Trial. *JAMA Cardiol.* 2019;4:230–235.
4. Saberi S, Wheeler M, Bragg-Gresham J, Hornsby W, Agarwal PP, Attili A, Concannon M, Dries A, Shmargad Y, Salisbury H, Kumar S, Herrera J, Myers J, Helms AS, Ashley EA, Day SM. Effect of moderate-intensity exercise training on peak oxygen consumption in patients with hypertrophic cardiomyopathy a randomized clinical trial. *JAMA - Journal of the American Medical Association.* 2017;317:1349–1357.
5. Lewis GD, Voors AA, Cohen-Solal A, Metra M, Whellan DJ, Ezekowitz JA, Böhm M, Teerlink JR, Docherty KF, Lopes RD, Divanji PH, Heitner SB, Kupfer S, Malik FI, Meng L, Wohltman A, Felker GM. Effect of Omecamtiv Mecarbil on Exercise Capacity in Chronic Heart Failure with Reduced Ejection Fraction: The METEORIC-HF Randomized Clinical Trial. *JAMA.* 2022;328:259–269.
6. Kitzman DW, Brubaker P, Morgan T, Haykowsky M, Hundley G, Kraus WE, Eggebeen J, Nicklas BJ. Effect of Caloric Restriction or Aerobic Exercise Training on Peak Oxygen Consumption and Quality of Life in Obese Older Patients With Heart Failure With Preserved Ejection Fraction: A Randomized Clinical Trial. *JAMA.* 2016;315:36–46.
7. Dybro AM, Rasmussen TB, Nielsen RR, Andersen MJ, Jensen MK, Poulsen SH. Randomized Trial of Metoprolol in Patients With Obstructive Hypertrophic Cardiomyopathy. *J Am Coll Cardiol* [Internet]. 2021 [cited 2022 Aug 10];78:2505–2517. Available from: <https://pubmed.ncbi.nlm.nih.gov/34915981/>
8. Macnamara JP, Dias KA, Hearon CM, Ivey E, Delgado VA, Saland S, Samels M, Hieda M, Turer AT, Link MS, Sarma S, Levine BD. Randomized Controlled Trial of Moderate-and High-

Intensity Exercise Training in Patients With Hypertrophic Cardiomyopathy: Effects on Fitness and Cardiovascular Response to Exercise. *J Am Heart Assoc.* 2023;12.
