# Supplementary material for: Aficamten and Cardiopulmonary Exercise Test Performance: A Substudy of the SEQUOIA-HCM Randomized Clinical Trial
Source: PubMed Central journal article supplement — JAMA Cardiol. 2024 Sep 4;9(11):990–1000. doi: 10.1001/jamacardio.2024.2781 (PMC11375526; doi:10.1001/jamacardio.2024.2781), 2024-09-04
Supplement: jamacardiol-e242781-s003.pdf [file jamacardiol-e242781-s003.pdf]

## Supplementary Online Content

Lee MMY, Masri A, Nassif ME, et al; SEQUOIA-HCM Investigators. Aficamten and cardiopulmonary exercise test performance: a substudy of the SEQUOIA-HCM randomized clinical trial. *JAMA Cardiol*. Published online September 4, 2024. doi:10.1001/jamacardio.2024.2781

**eFigure.** CONSORT Diagram: Recruitment, Randomization, and Follow-Up in the SEQUOIA-HCM Trial

**eTable 1.** Responder Analyses of Categorical Change in  $pVO_2$  With Aficamten vs Placebo at 24 Weeks

**eTable 2.** Univariate Correlations Between Change in Components of Integrated Exercise Response z Score and Changes in Other Measures

**eTable 3.** Multivariate Regression Model to Evaluate Independent Degree of Variance Explained in Change in  $pVO_2$  and  $VE/VCO_2$  Slope From Baseline to Week 24 by Clinical Variables

**eFigure. CONSORT Diagram: Recruitment, Randomization, and Follow-up in the SEQUOIA-HCM Trial**

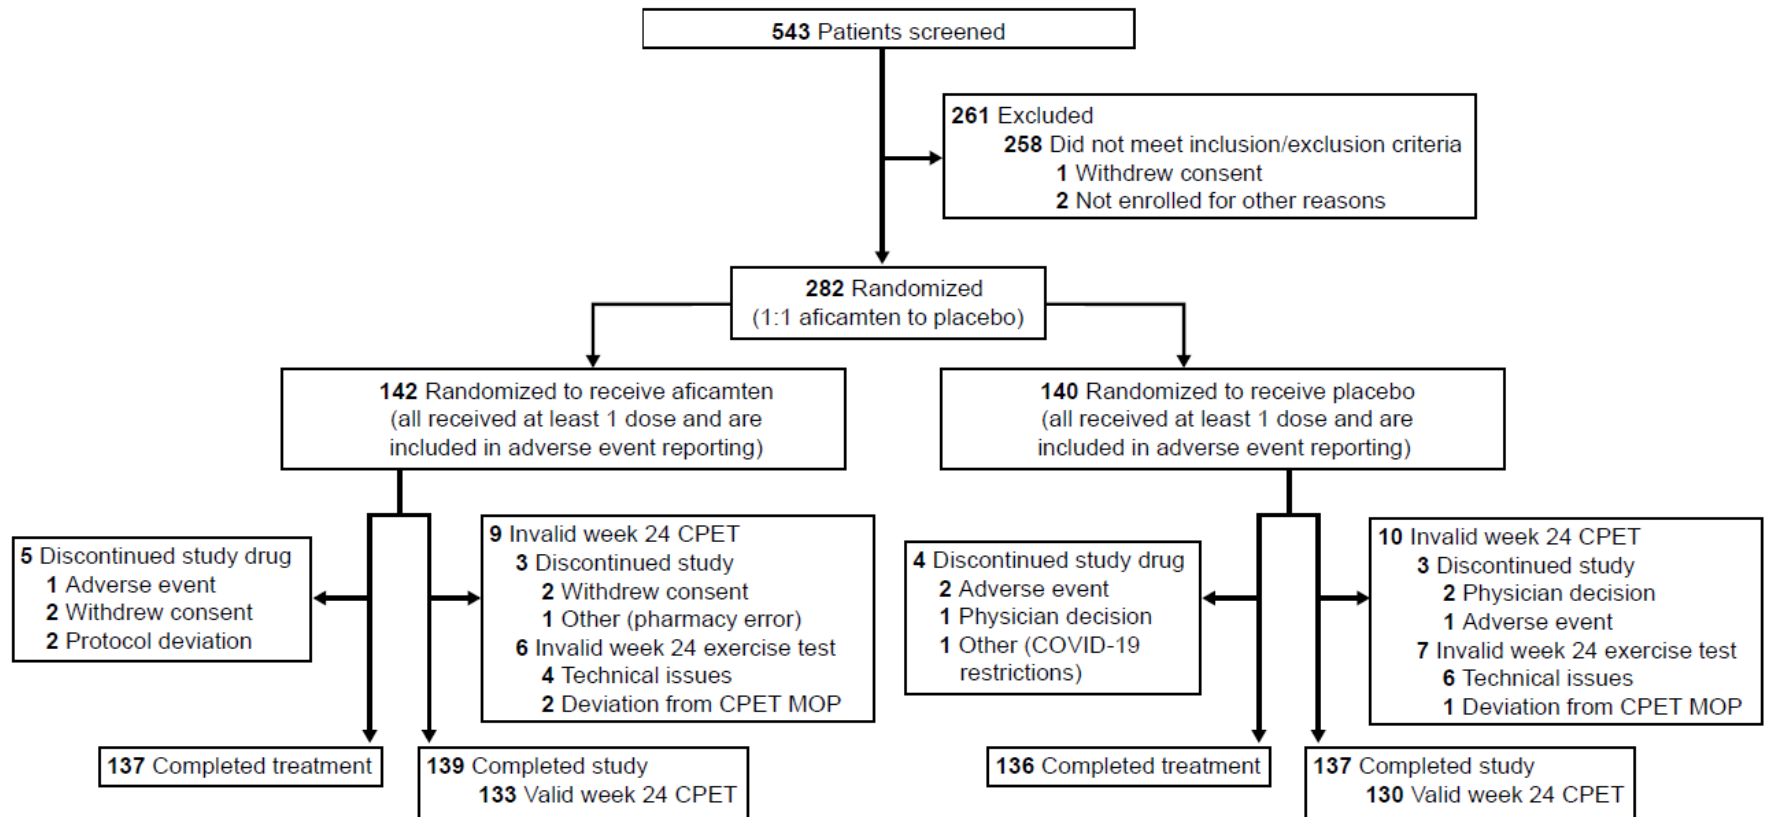

COVID-19 indicates coronavirus disease 2019; CPET, cardiopulmonary exercise test; MOP, manual of operations; SEQUOIA-HCM, Safety, Efficacy and Quantitative Understanding of Obstruction Impact of Aficamten in HCM.

**eTable 1. Responder Analyses of Categorical Change in pVO<sub>2</sub> With Aficamten vs Placebo at 24 Weeks**

| <b>Outcome</b>                           | <b>Placebo</b> | <b>Aficamten</b> | <b>OR (95% CI)</b>  | <b>Risk difference (95% CI)</b> | <b>NNT</b> |
|------------------------------------------|----------------|------------------|---------------------|---------------------------------|------------|
| Any improvement (small/moderate/large)   | 67 (47.9%)     | 105 (73.9%)      | 3.09 (1.88 to 5.09) | +26% (+15% to +37%)             | 3.8        |
| Moderate/large improvement               | 44 (31.4%)     | 75 (52.8%)       | 2.44 (1.50 to 3.96) | +21% (+10% to +33%)             | 4.7        |
| Large improvement                        | 23 (16.4%)     | 46 (32.4%)       | 2.44 (1.38 to 4.29) | +15% (+6% to +26%)              | 6.3        |
| Any deterioration (small/moderate/large) | 73 (52.1%)     | 37 (26.1%)       | 0.32 (0.20 to 0.53) | -26% (-37% to -15%)             | -3.8       |

NNT indicates number needed to treat; OR, odds ratio; pVO<sub>2</sub>, peak oxygen uptake.

**eTable 2. Univariate Correlations Between Change in Components of Integrated Exercise Response z Score and Changes in Other Measures**

|                                                                                 |                                                | <b>Overall</b> |                    |                |
|---------------------------------------------------------------------------------|------------------------------------------------|----------------|--------------------|----------------|
|                                                                                 |                                                | <b>N</b>       | <b>Correlation</b> | <b>P value</b> |
| <b>Change in<br/><u>pVO<sub>2</sub></u> vs</b>                                  | <b>Clinical variable</b>                       |                |                    |                |
|                                                                                 | KCCQ-CSS                                       | 262            | 0.206              | < .001         |
|                                                                                 | NYHA functional class                          | 263            | -0.173             | = 0.005        |
|                                                                                 | Log-transformed NT-proBNP                      | 254            | -0.328             | < .001         |
|                                                                                 | Log-transformed hs-cTnl                        | 246            | -0.141             | = 0.03         |
|                                                                                 | Resting LVOT-G                                 | 258            | -0.162             | = 0.009        |
|                                                                                 | Valsalva LVOT-G                                | 258            | -0.135             | = 0.03         |
|                                                                                 | LAVI                                           | 253            | -0.094             | = 0.14         |
|                                                                                 | Septal E/e'                                    | 251            | -0.244             | < .001         |
|                                                                                 | Mitral regurgitation                           | 255            | -0.104             | = 0.10         |
|                                                                                 | <b>Exercise test variable</b>                  |                |                    |                |
|                                                                                 | Workload                                       | 262            | 0.517              | < .001         |
|                                                                                 | Exercise duration                              | 243            | 0.518              | < .001         |
|                                                                                 | Peak RER                                       | 263            | 0.000              | > .99          |
|                                                                                 | Peak systolic blood pressure                   | 252            | 0.290              | < .001         |
|                                                                                 | Ventilatory efficiency throughout exercise     | 263            | -0.227             | < .001         |
|                                                                                 | Ventilatory efficiency pre-anaerobic threshold | 262            | -0.285             | < .001         |
| Anaerobic threshold                                                             | 262                                            | 0.750          | < .001             |                |
| <b>Change in<br/><u>VE/VCO<sub>2</sub> slope throughout<br/>exercise</u> vs</b> | <b>Clinical variable</b>                       |                |                    |                |
|                                                                                 | KCCQ-CSS                                       | 264            | -0.158             | = 0.010        |
|                                                                                 | NYHA functional class                          | 265            | 0.284              | < .001         |
|                                                                                 | Log-transformed NT-proBNP                      | 256            | 0.312              | < .001         |
|                                                                                 | Log-transformed hs-cTnl                        | 248            | 0.074              | = 0.24         |
|                                                                                 | Resting LVOT-G                                 | 260            | 0.244              | < .001         |
|                                                                                 | Valsalva LVOT-G                                | 260            | 0.222              | < .001         |
|                                                                                 | LAVI                                           | 255            | 0.136              | = 0.03         |
|                                                                                 | Septal E/e'                                    | 253            | 0.105              | = 0.09         |
| Mitral regurgitation                                                            | 257                                            | -0.103         | = 0.10             |                |

---

**Exercise variable**

|                                                |     |        |        |
|------------------------------------------------|-----|--------|--------|
| Workload                                       | 263 | -0.050 | = 0.42 |
| Exercise duration                              | 244 | -0.097 | = 0.13 |
| Peak RER                                       | 265 | -0.035 | = 0.57 |
| Peak systolic blood pressure                   | 254 | -0.079 | = 0.21 |
| Ventilatory efficiency throughout exercise     | 265 | 1.000  | < .001 |
| Ventilatory efficiency pre-anaerobic threshold | 264 | 0.505  | < .001 |
| Anaerobic threshold                            | 262 | -0.234 | < .001 |

---

Abbreviations: hs-cTnl, high-sensitivity cardiac troponin I; KCCQ-CSS, Kansas City Cardiomyopathy Questionnaire-Clinical Summary Score; LAVI, left atrial volume index; LVOT-G, left ventricular outflow tract gradient; NT-proBNP, N-terminal pro-brain natriuretic peptide; NYHA, New York Heart Association; pVO<sub>2</sub>, peak oxygen uptake; RER, respiratory exchange ratio; VCO<sub>2</sub>, carbon dioxide output; VE, minute ventilation.

**eTable 3. Multivariate Regression Model to Evaluate Independent Degree of Variance Explained in Change in pVO<sub>2</sub> and VE/VCO<sub>2</sub> Slope From Baseline to Week 24 by Clinical Variables**

|                                                                                            | Multivariate regression model covariates   | R <sup>2</sup> | Change in R <sup>2</sup> |
|--------------------------------------------------------------------------------------------|--------------------------------------------|----------------|--------------------------|
| <b>Variance explained in change in <u>pVO<sub>2</sub></u></b>                              | 1) pVO <sub>2</sub>                        | 0.037          | N/A                      |
|                                                                                            | 2) model 1 + log-transformed NT-proBNP     | 0.200          | 0.163 <sup>a</sup>       |
|                                                                                            | 3) model 2 + E/e'                          | 0.215          | 0.015 <sup>a</sup>       |
|                                                                                            | 4) model 3 + KCCQ-CSS                      | 0.239          | 0.024 <sup>a</sup>       |
|                                                                                            | 5) model 4 + NYHA class                    | 0.253          | 0.014                    |
|                                                                                            | 6) model 5 + resting LVOT-G                | 0.260          | 0.007                    |
|                                                                                            | 7) model 6 + log-transformed hs-cTnI       | 0.269          | 0.009                    |
|                                                                                            | 8) model 7 + Valsalva LVOT-G               | 0.283          | 0.014                    |
|                                                                                            | 9) model 8 + mitral regurgitation          | 0.290          | 0.008                    |
|                                                                                            | 10) model 9 + LAVI                         | 0.309          | 0.019                    |
| <b>Variance explained in change in <u>VE/VCO<sub>2</sub></u> slope throughout exercise</b> | 1) VE/VCO <sub>2</sub> throughout exercise | 0.094          | N/A                      |
|                                                                                            | 2) model 1 + log-transformed NT-proBNP     | 0.167          | 0.073 <sup>a</sup>       |
|                                                                                            | 3) model 2 + NYHA class                    | 0.181          | 0.014                    |
|                                                                                            | 4) model 3 + LVOT-G rest                   | 0.197          | 0.016                    |
|                                                                                            | 5) model 4 + LVOT-G Valsalva               | 0.200          | 0.003                    |
|                                                                                            | 6) model 5 + KCCQ-CSS                      | 0.201          | 0.002                    |
|                                                                                            | 7) model 6 + LAVI                          | 0.224          | 0.023 <sup>a</sup>       |
|                                                                                            | 8) model 7 + E/e'                          | 0.237          | 0.012                    |
|                                                                                            | 9) model 8 + mitral regurgitation          | 0.273          | 0.036 <sup>a</sup>       |

Abbreviations: hs-cTnI, high-sensitivity cardiac troponin I; KCCQ-CSS, Kansas City Cardiomyopathy Questionnaire-Clinical Summary Score; LAVI, left atrial volume index; LVOT-G, left ventricular outflow tract gradient; N/A, not available; NT-proBNP, N-terminal pro-brain natriuretic peptide; NYHA, New York Heart Association; pVO<sub>2</sub>, peak oxygen uptake; VCO<sub>2</sub>, carbon dioxide output; VE, minute ventilation.

<sup>a</sup> Indicates a significance level with  $P < .05$  for incremental variance explained in change in pVO<sub>2</sub> or change in VE/VCO<sub>2</sub> slope throughout exercise from baseline to week 24.
