# Supplementary material for: Aficamten and Cardiopulmonary Exercise Test Performance: A Substudy of the SEQUOIA-HCM Randomized Clinical Trial
Source: PubMed Central journal article supplement — JAMA Cardiol. 2024 Sep 4;9(11):990–1000. doi: 10.1001/jamacardio.2024.2781 (PMC11375526; doi:10.1001/jamacardio.2024.2781), 2024-09-04
Supplement: jamacardiol-e242781-s004.pdf [file jamacardiol-e242781-s004.pdf]

\*Indicates required information. Only first name, last name, and suffix will appear in PubMed.

| <b>*Group Name(s): SEQUOIA-HCM Investigators</b> |                   |                              |                  |                                                |                                              |                                                         |                                                                                            |  |  |  |  |
|--------------------------------------------------|-------------------|------------------------------|------------------|------------------------------------------------|----------------------------------------------|---------------------------------------------------------|--------------------------------------------------------------------------------------------|--|--|--|--|
| <b>*First Name and Middle Initial(s)</b>         | <b>*Last Name</b> | <b>*Suffix (eg, Jr, III)</b> | Academic Degrees | Institution                                    | Location (city, state/province, country)     | Role or Contribution, eg, chair, principal investigator | Group (if more than 1 Group listed in the byline) and/or Subgroup (eg, Steering Committee) |  |  |  |  |
| Andrew                                           | Wang              |                              |                  | Duke University                                | Morristown, North Carolina, United States    | PI                                                      |                                                                                            |  |  |  |  |
| Mark V                                           | Sherrid           |                              |                  | NYU Langone Medical Center                     | New York, New York, United States            | PI                                                      |                                                                                            |  |  |  |  |
| Jacob P                                          | Kelly             |                              |                  | Alaska Heart and Vascular Institute            | Anchorage, Alaska, United States             | PI                                                      |                                                                                            |  |  |  |  |
| Ali J                                            | Marian            |                              |                  | Baylor St. Luke's Medical Center               | Houston, Texas, United States                | PI                                                      |                                                                                            |  |  |  |  |
| Anjali Tiku                                      | Owens             |                              |                  | Penn Heart and Vascular Center - Heart Failure | Philadelphia, Pennsylvania, United States    | PI                                                      |                                                                                            |  |  |  |  |
| Omar                                             | Wever-Pinzon      |                              |                  | The University of Utah Health Sciences Center  | Salt Lake City, Utah, United States          | PI                                                      |                                                                                            |  |  |  |  |
| David                                            | Owens             |                              |                  | University of Washington Medical Center        | Seattle, Washington, United States           | PI                                                      |                                                                                            |  |  |  |  |
| Matthew T                                        | Wheeler           |                              |                  | Stanford University                            | Palo Alto, California, United States         | PI                                                      |                                                                                            |  |  |  |  |
| Sherif F                                         | Nagueh            |                              |                  | Houston Methodist Hospital                     | Houston, Texas, United States                | PI                                                      |                                                                                            |  |  |  |  |
| Florian                                          | Rader             |                              |                  | Cedars-Sinai Medical Center                    | Los Angeles, California, United States       | PI                                                      |                                                                                            |  |  |  |  |
| Frank A                                          | McGrew            |                              |                  | Baptist Memorial Health Care                   | Germantown, Tennessee, United States         | PI                                                      |                                                                                            |  |  |  |  |
| Timothy                                          | Wong              |                              |                  | University of Pittsburg Medical Center         | Pittsburgh, Pennsylvania, United States      | PI                                                      |                                                                                            |  |  |  |  |
| Thomas                                           | O'Neill           |                              |                  | Wake Forest University School of Medicine      | Winston-Salem, North Carolina, United States | PI                                                      |                                                                                            |  |  |  |  |
| Richard G                                        | Bach              |                              |                  | Washington University School Of Medicine       | Saint Louis, Missouri, United States         | PI                                                      |                                                                                            |  |  |  |  |
| Matthew                                          | Martinez          |                              |                  | Morristown Medical Center                      | Morristown, New Jersey, United States        | PI                                                      |                                                                                            |  |  |  |  |

## Supplemental Online Content: Nonauthor Collaborators

\*Indicates required information. Only first name, last name, and suffix will appear in PubMed.

| *First Name and Middle Initial(s) | *Last Name  | *Suffix (eg, Jr, III) | Academic Degrees | Institution                                                                                                             | Location (city, state/province, country) | Role or Contribution, eg, chair, principal investigator | Group (if more than 1 Group listed in the byline) and/or Subgroup (eg, Steering Committee) |  |  |  |  |
|-----------------------------------|-------------|-----------------------|------------------|-------------------------------------------------------------------------------------------------------------------------|------------------------------------------|---------------------------------------------------------|--------------------------------------------------------------------------------------------|--|--|--|--|
| Neal K                            | Lakdawala   |                       |                  | Harvard Medical School - Brigham and Women's Hospital (BWH) - The Schuster Family Transplantation Research Center (TRC) | Boston, Massachusetts, United States     | PI                                                      |                                                                                            |  |  |  |  |
| Elias                             | Collado     |                       |                  | Holy Cross Hospital, Fort Lauderdale                                                                                    | Fort Lauderdale, Florida, United States  | PI                                                      |                                                                                            |  |  |  |  |
| Aslan                             | Turer       |                       |                  | The University Of Texas Southwestern Medical Center                                                                     | Dallas, Texas, United States             | PI                                                      |                                                                                            |  |  |  |  |
| Milind                            | Desai Y     |                       |                  | Cleveland Clinic - Taussig Cancer Institute                                                                             | Cleveland, Ohio, United States           | PI                                                      |                                                                                            |  |  |  |  |
| Zainal                            | Hussain     |                       |                  | Ascension St. John Clinical Research Institute                                                                          | Tulsa, Oklahoma, United States           | PI                                                      |                                                                                            |  |  |  |  |
| Albree F                          | Tower-Rader |                       |                  | Massachusetts General Hospital (MGH) - Interventional Cardiology Associates                                             | Boston, Massachusetts, United States     | PI                                                      |                                                                                            |  |  |  |  |
| Bashar                            | Hannawi     |                       |                  | Henry Ford Medical Center                                                                                               | Detroit, Michigan, United States         | PI                                                      |                                                                                            |  |  |  |  |
| Jeffrey                           | Geske       |                       |                  | Mayo Clinic                                                                                                             | Rochester, Minnesota, United States      | PI                                                      |                                                                                            |  |  |  |  |
| Sara                              | Saberi      |                       |                  | University of Michigan Health System                                                                                    | Ann Arbor, Michigan, United States       | PI                                                      |                                                                                            |  |  |  |  |
| Dermot                            | Phelan      |                       |                  | Sanger Heart & Vascular Institute, Atrium Healthcare                                                                    | Charlotte, North Carolina, United States | PI                                                      |                                                                                            |  |  |  |  |
| Christopher                       | Kramer      |                       |                  | University of Virginia Health System                                                                                    | Charlottesville, Virginia, United States | PI                                                      |                                                                                            |  |  |  |  |
| Nitasha                           | Sarswat     |                       |                  | The University of Chicago Medicine                                                                                      | Chicago, Illinois, United States         | PI                                                      |                                                                                            |  |  |  |  |
| Ferhaan                           | Ahmad       |                       |                  | The University of Iowa Hospitals & Clinics                                                                              | Iowa City, Iowa, United States           | PI                                                      |                                                                                            |  |  |  |  |
| Lubna                             | Choudhury   |                       |                  | Northwestern Memorial Hospital                                                                                          | Chicago, Illinois, United States         | PI                                                      |                                                                                            |  |  |  |  |
| Jeremy S                          | Markowitz   |                       |                  | University of Minnesota                                                                                                 | Minneapolis, Minnesota, United States    | PI                                                      |                                                                                            |  |  |  |  |
| Sounok                            | Sen         |                       |                  | Yale School of Medicine                                                                                                 | New Haven, Connecticut, United States    | PI                                                      |                                                                                            |  |  |  |  |

\*Indicates required information. Only first name, last name, and suffix will appear in PubMed.

| *First Name and Middle Initial(s) | *Last Name   | *Suffix (eg, Jr, III) | Academic Degrees | Institution                                                                                | Location (city, state/province, country)        | Role or Contribution, eg, chair, principal investigator | Group (if more than 1 Group listed in the byline) and/or Subgroup (eg, Steering Committee) |  |  |  |  |
|-----------------------------------|--------------|-----------------------|------------------|--------------------------------------------------------------------------------------------|-------------------------------------------------|---------------------------------------------------------|--------------------------------------------------------------------------------------------|--|--|--|--|
| Patrick                           | Bering       |                       |                  | MedStar Washington Hospital Center                                                         | Washington, District of Columbia, United States | PI                                                      |                                                                                            |  |  |  |  |
| Martin S                          | Maron        |                       |                  | Tufts Medical Center                                                                       | Boston, Massachusetts, United States            | PI                                                      |                                                                                            |  |  |  |  |
| Sandeep                           | Jani         |                       |                  | MedStar Franklin Square Medical Center                                                     | Baltimore, Maryland, United States              | PI                                                      |                                                                                            |  |  |  |  |
| Douglas                           | Brinkley     |                       |                  | Vanderbilt University Medical Center (VUMC) - Vanderbilt University Hospital (VUH)         | Nashville, Tennessee, United States             | PI                                                      |                                                                                            |  |  |  |  |
| Srihari                           | Naidu        |                       |                  | Westchester Medical Center                                                                 | Valhalla, New York, United States               | PI                                                      |                                                                                            |  |  |  |  |
| Mathew S                          | Maurer       |                       |                  | New York-Presbyterian/ Columbia University Medical Centre                                  | New York, New York, United States               | PI                                                      |                                                                                            |  |  |  |  |
| Noah                              | Moss         |                       |                  | Mount Sinai Hospital                                                                       | New York, New York, United States               | PI                                                      |                                                                                            |  |  |  |  |
| Ozlem                             | Bilen        |                       |                  | Emory University Hospital, The Emory Clinic                                                | Atlanta, Georgia, United States                 | PI                                                      |                                                                                            |  |  |  |  |
| Jorge                             | Silva Enciso |                       |                  | University of California - San Diego                                                       | La Jolla, California, United States             | PI                                                      |                                                                                            |  |  |  |  |
| Robert                            | Fraser       |                       |                  | Minneapolis Heart Institute                                                                | Minneapolis, Minnesota, United States           | PI                                                      |                                                                                            |  |  |  |  |
| Olakunle                          | Akinboboye   |                       |                  | Queens Heart Institute                                                                     | Rosedale, New York, United States               | PI                                                      |                                                                                            |  |  |  |  |
| Craig                             | Asher        |                       |                  | Cleveland Clinic Florida                                                                   | Weston, Florida, United States                  | PI                                                      |                                                                                            |  |  |  |  |
| Sitaramesh                        | Emani        |                       |                  | Ohio State University Medical Center                                                       | Columbus, Ohio, United States                   | PI                                                      |                                                                                            |  |  |  |  |
| Abhinav                           | Sharma       |                       |                  | Heart and Vascular Center - Center for Advanced Care - Froedtert Hospital                  | Milwaukee, Wisconsin, United States             | PI                                                      |                                                                                            |  |  |  |  |
| David                             | Fermin       |                       |                  | Spectrum Health Medical Group (SHMG) - Cardiology (West Michigan Heart P.C) - Grand Rapids | Grand Rapids, Michigan, United States           | PI                                                      |                                                                                            |  |  |  |  |
| Melissa                           | Lyle         |                       |                  | Mayo Clinic                                                                                | Jacksonville, Florida, United States            | PI                                                      |                                                                                            |  |  |  |  |

\*Indicates required information. Only first name, last name, and suffix will appear in PubMed.

| *First Name and Middle Initial(s) | *Last Name      | *Suffix (eg, Jr, III) | Academic Degrees | Institution                                                                              | Location (city, state/province, country)  | Role or Contribution, eg, chair, principal investigator | Group (if more than 1 Group listed in the byline) and/or Subgroup (eg, Steering Committee) |  |  |  |  |  |  |
|-----------------------------------|-----------------|-----------------------|------------------|------------------------------------------------------------------------------------------|-------------------------------------------|---------------------------------------------------------|--------------------------------------------------------------------------------------------|--|--|--|--|--|--|
| David                             | Raymer          |                       |                  | UCHealth Heart and Vascular Center - Anschutz Medical Campus                             | Aurora, Colorado, United States           | PI                                                      |                                                                                            |  |  |  |  |  |  |
| Andrew                            | Darlington      |                       |                  | Piedmont Fayette Hospital                                                                | Fayetteville, Georgia, United States      | PI                                                      |                                                                                            |  |  |  |  |  |  |
| Frederic                          | Resnic          |                       |                  | Lahey Hospital & Medical Center                                                          | Burlington, Massachusetts, United States  | PI                                                      |                                                                                            |  |  |  |  |  |  |
| Christopher D                     | Nielsen         |                       |                  | Medical University of South Carolina                                                     | Charleston, South Carolina, United States | PI                                                      |                                                                                            |  |  |  |  |  |  |
| Marco                             | Metra           |                       |                  | Azienda Ospedaliera Spedali Civili di Brescia-Universita degli Studi Di Brescia          | Brescia, Italy                            | PI                                                      |                                                                                            |  |  |  |  |  |  |
| Beatrice                          | Musumeci        |                       |                  | Azienda Ospedaliera S'Andrea di Roma - UOC Cardiologia                                   | Roma, Italy                               | PI                                                      |                                                                                            |  |  |  |  |  |  |
| Michele                           | Emdin           |                       |                  | Fondazione Toscana Gabriele Monasterio Per La Ricerca Medica E Di Sanita Pubblica (Ftgm) | Pisa, Italy                               | PI                                                      |                                                                                            |  |  |  |  |  |  |
| Mattia                            | Targetti        |                       |                  | Azienda Ospedaliero Universitaria Careggi                                                | Firenze, Italy                            | PI                                                      |                                                                                            |  |  |  |  |  |  |
| Marco                             | Canepa          |                       |                  | Ospedale Policlinico San Martino - IRCCS                                                 | Genova, Italy                             | PI                                                      |                                                                                            |  |  |  |  |  |  |
| Michelle                          | Michels         |                       |                  | Erasmus Medisch Centrum 1                                                                | Rotterdam, South Holland, Netherlands     | PI                                                      |                                                                                            |  |  |  |  |  |  |
| Christian                         | Knackstedt      |                       |                  | Maastricht University Medical Center (MUMC)                                              | Maastricht, Netherlands                   | PI                                                      |                                                                                            |  |  |  |  |  |  |
| Ahmad S.                          | Amin            |                       |                  | Amsterdam University Medical Center (Amsterdam UMC), Academic Medical Center (AMC)       | Amsterdam, Noord-Holland, Netherlands     | PI                                                      |                                                                                            |  |  |  |  |  |  |
| Roberto                           | Barriales Villa |                       |                  | Complejo Hospital Universitario A Coruna                                                 | A Coruna, Spain                           | PI                                                      |                                                                                            |  |  |  |  |  |  |
| Pablo                             | Garcia Pavia    |                       |                  | Hospital Universitario Puerta de Hierro de Majadahonda                                   | Majadahonda, Spain                        | PI                                                      |                                                                                            |  |  |  |  |  |  |
| Juan Ramon                        | Gimeno Blanes   |                       |                  | Hospital Universitario Virgen de la Arrixaca                                             | El Palmar, Spain                          | PI                                                      |                                                                                            |  |  |  |  |  |  |
| Juan Ramon                        | Gimeno Blanes   |                       |                  | Hospital Universitario Virgen de la Arrixaca                                             | El Palmar, Spain                          | PI                                                      |                                                                                            |  |  |  |  |  |  |

\*Indicates required information. Only first name, last name, and suffix will appear in PubMed.

| *First Name and Middle Initial(s) | *Last Name     | *Suffix (eg, Jr, III) | Academic Degrees | Institution                                                                                         | Location (city, state/province, country) | Role or Contribution, eg, chair, principal investigator | Group (if more than 1 Group listed in the byline) and/or Subgroup (eg, Steering Committee) |  |  |  |  |
|-----------------------------------|----------------|-----------------------|------------------|-----------------------------------------------------------------------------------------------------|------------------------------------------|---------------------------------------------------------|--------------------------------------------------------------------------------------------|--|--|--|--|
| Rafael Jesus                      | Hidalgo Urbano |                       |                  | Hospital Universitario Virgen Macarena-merge                                                        | Sevilla, Spain                           | PI                                                      |                                                                                            |  |  |  |  |
| Luis Miguel                       | Rincon Diaz    |                       |                  | Hospital Universitario de Salamanca                                                                 | Salamanca, Spain                         | PI                                                      |                                                                                            |  |  |  |  |
| Tomas Vicente V                   | Ripoll Vera    |                       |                  | Hospital Son Llatzer                                                                                | Palma de Mallorca, Spain                 | PI                                                      |                                                                                            |  |  |  |  |
| Ana                               | Garcia Alvarez |                       |                  | Hospital Clinic i Provincial de Barcelona                                                           | Barcelona, Spain                         | PI                                                      |                                                                                            |  |  |  |  |
| David                             | Zemanek        |                       |                  | Interni klinika kardiologie a angiologie 1. Lekarske fakulty a Vseobecne fakultni nemocnice v Praze | Prague 2, Czech Republic                 | PI                                                      |                                                                                            |  |  |  |  |
| MortenK                           | Jensen         |                       |                  | Aarhus Universitetshospital                                                                         | Aarhus, Denmark                          | PI                                                      |                                                                                            |  |  |  |  |
| Jens                              | Mogensen       |                       |                  | Aalborg University Hospital, Aalborg Sygehus                                                        | Aalborg, Nordjylland, Denmark            | PI                                                      |                                                                                            |  |  |  |  |
| Jens J                            | Thune          |                       |                  | Bispebjerg Hospital, University of Copenhagen                                                       | Copenhagen Nv, Denmark                   | PI                                                      |                                                                                            |  |  |  |  |
| Henning                           | Bundgaard      |                       |                  | Hjertecentret (The Heart Center)-Copenhagen University Hospital/Rigshospitalet                      | Copenhagen, Hovedstaden, Denmark         | PI                                                      |                                                                                            |  |  |  |  |
| Philippe                          | Charron        |                       |                  | CHU Paris-GH La Pitie Salpetriere-Charles Foix - Hopital Pitie-Salpetriere                          | PARIS, France                            | PI                                                      |                                                                                            |  |  |  |  |
| Jean-Noel                         | Trochu         |                       |                  | CHU de Nantes - Hopital Nord Laennec                                                                | Nantes, France                           | PI                                                      |                                                                                            |  |  |  |  |
| Gilbert                           | Habib          |                       |                  | Assistance Publique Hopitaux de Marseille (AP-HM) - Hopital de La Timone                            | Marseille, France                        | PI                                                      |                                                                                            |  |  |  |  |
| Thibault                          | Lhermusier     |                       |                  | Centre Hospitalier Universitaire de Toulouse - Hopital Rangueil                                     | Toulouse Cedex 09, France                | PI                                                      |                                                                                            |  |  |  |  |
| Patricia                          | Reant          |                       |                  | Centre Hospitalier Universitaire (CHU) du Haut Leveque                                              | Pessac, France                           | PI                                                      |                                                                                            |  |  |  |  |
| Albert A                          | Hagege         |                       |                  | Groupement Hospitalier Universitaire Ouest - Hopital Europeen Georges-Pompidou (HEGP)               | Paris, France                            | PI                                                      |                                                                                            |  |  |  |  |
| Damien                            | Logeart        |                       |                  | Hopital Lariboisiere,Hospitalier Universitaire Nord                                                 | Paris, France                            | PI                                                      |                                                                                            |  |  |  |  |
| Veselin                           | Mitrovic       |                       |                  | Kerckhoff-Klinik- Bad Nauheim                                                                       | Bad Nauheim, Germany                     | PI                                                      |                                                                                            |  |  |  |  |

\*Indicates required information. Only first name, last name, and suffix will appear in PubMed.

| *First Name and Middle Initial(s) | *Last Name      | *Suffix (eg, Jr, III) | Academic Degrees | Institution                                                                                 | Location (city, state/province, country) | Role or Contribution, eg, chair, principal investigator | Group (if more than 1 Group listed in the byline) and/or Subgroup (eg, Steering Committee) |  |  |  |  |
|-----------------------------------|-----------------|-----------------------|------------------|---------------------------------------------------------------------------------------------|------------------------------------------|---------------------------------------------------------|--------------------------------------------------------------------------------------------|--|--|--|--|
| Frank                             | Edelmann        |                       |                  | Charite Universitaetsmedizin Berlin                                                         | Berlin, Germany                          | PI                                                      |                                                                                            |  |  |  |  |
| Tim                               | Seidler         |                       |                  | Klinikum der Georg-August-Universitaet Goettingen                                           | Goettingen, Germany                      | PI                                                      |                                                                                            |  |  |  |  |
| Benjamin                          | Meder           |                       |                  | Universitaetsklinikum Heidelberg                                                            | Heidelberg, Germany                      | PI                                                      |                                                                                            |  |  |  |  |
| Paul Christian                    | Schulze         |                       |                  | Universitaetsklinikum Jena                                                                  | Jena, Germany                            | PI                                                      |                                                                                            |  |  |  |  |
| Stefan                            | Stoerk          |                       |                  | University of Wurzburg, Comprehensive Heart Failure Center (CHFC)                           | Wuerzburg, Germany                       | PI                                                      |                                                                                            |  |  |  |  |
| Tarek                             | Bekfani         |                       |                  | Universitaetsklinikum Magdeburg                                                             | Magdeburg, Germany                       | PI                                                      |                                                                                            |  |  |  |  |
| Tienush                           | Rassaf          |                       |                  | Universitaetsklinikum Essen                                                                 | Essen, Germany                           | PI                                                      |                                                                                            |  |  |  |  |
| Bela                              | Merkely         |                       |                  | Semmelweis Egyetem, Varosmajori Sziv es Ergyogyaszati Klinika                               | Budapest, Hungary                        | PI                                                      |                                                                                            |  |  |  |  |
| Michael                           | Arad            |                       |                  | The Chaim Sheba Medical Center                                                              | Ramat-Gan, Tel Hashomer, Israel          | PI                                                      |                                                                                            |  |  |  |  |
| Majdi                             | Halabi          |                       |                  | Ziv MC                                                                                      | Safed, Israel                            | PI                                                      |                                                                                            |  |  |  |  |
| Donna                             | Zwas            |                       |                  | Hadassah Medical Center                                                                     | Jerusalem, Israel                        | PI                                                      |                                                                                            |  |  |  |  |
| Xavier                            | Piltz           |                       |                  | The Barzilai Medical Center, Faculty Of Health Sciences, Ben Gurion University Of The Negev | Ashkelon, Israel                         | PI                                                      |                                                                                            |  |  |  |  |
| Offir                             | Paz             |                       |                  | Kaplan Medical Center                                                                       | Rehovot, Israel                          | PI                                                      |                                                                                            |  |  |  |  |
| Manhal                            | Habib           |                       |                  | Rambam Health Care Campus (RHCC)                                                            | Haifa, Israel                            | PI                                                      |                                                                                            |  |  |  |  |
| Dariusz                           | Dudek           |                       |                  | Krakowskie Centrum Diagnostyczno-Kliniczne                                                  | Krakow, Malopolskie, Poland              | PI                                                      |                                                                                            |  |  |  |  |
| Artur                             | Oreziak         |                       |                  | Narodowy Instytut Kardiologii Stefana kard. Wyszyńskiego<br>Panstwowy Instytut Badawczy     | Warszawa, Poland                         | PI                                                      |                                                                                            |  |  |  |  |
| Wojciech                          | Wojakowski      |                       |                  | Kardio Brynow Sp. z o.o.                                                                    | Katowice, Slaskie, Poland                | PI                                                      |                                                                                            |  |  |  |  |
| Alexandra M                       | Toste Batista   |                       |                  | Hospital Da Luz                                                                             | Lisbon, Portugal                         | PI                                                      |                                                                                            |  |  |  |  |
| Jose Adelino                      | Mesquita Bastos |                       |                  | CH Baixo Vouga - Aveiro                                                                     | Aveiro, Portugal                         | PI                                                      |                                                                                            |  |  |  |  |
| Perry M                           | Elliott         |                       |                  | St Bartholomew's Hospital-Barts Health NHS Trust                                            | London, London, United Kingdom           | PI                                                      |                                                                                            |  |  |  |  |

\*Indicates required information. Only first name, last name, and suffix will appear in PubMed.

| *First Name and Middle Initial(s) | *Last Name     | *Suffix (eg, Jr, III) | Academic Degrees | Institution                                                                                  | Location (city, state/province, country) | Role or Contribution, eg, chair, principal investigator | Group (if more than 1 Group listed in the byline) and/or Subgroup (eg, Steering Committee) |  |  |  |  |
|-----------------------------------|----------------|-----------------------|------------------|----------------------------------------------------------------------------------------------|------------------------------------------|---------------------------------------------------------|--------------------------------------------------------------------------------------------|--|--|--|--|
| Masliza                           | Mahmod         |                       |                  | John Radcliffe Hospital - Oxford University Hospitals NHS Foundation Trust                   | Oxford, United Kingdom                   | PI                                                      |                                                                                            |  |  |  |  |
| Caroline                          | Coats          |                       |                  | The Royal Hospital for Children - Glasgow Health Board                                       | Glasgow, United Kingdom                  | PI                                                      |                                                                                            |  |  |  |  |
| Robert                            | Cooper         |                       |                  | Liverpool Heart and Chest Hospital - Liverpool Heart and Chest Hospital NHS Foundation Trust | Liverpool, United Kingdom                | PI                                                      |                                                                                            |  |  |  |  |
| William                           | Bradlow        |                       |                  | Queen Elizabeth Hospital Birmingham-University Hospitals Birmingham NHS Foundation Trust     | Birmingham, United Kingdom               | PI                                                      |                                                                                            |  |  |  |  |
| Antonios                          | Pantazis       |                       |                  | Harefield Hospital - Royal Brompton And Harefield Nhs Foundation Trust                       | London, United Kingdom                   | PI                                                      |                                                                                            |  |  |  |  |
| Maria Teresa                      | Tome Esteban   |                       |                  | St George's Hospital - St George's University Hospitals NHS Foundation Trust                 | London, United Kingdom                   | PI                                                      |                                                                                            |  |  |  |  |
| Shaina                            | McGinnis       |                       | BS               | Division of Cardiology, Department of Medicine, Massachusetts General Hospital               | Boston, Massachusetts, United States     | CPET core laboratory staff                              |                                                                                            |  |  |  |  |
| Joseph                            | Campain        |                       | MD               | Division of Cardiology, Department of Medicine, Massachusetts General Hospital               | Boston, Massachusetts, United States     | CPET core laboratory staff                              |                                                                                            |  |  |  |  |
| Diane                             | Cocca-Spofford |                       | RN               | Division of Cardiology, Department of Medicine, Massachusetts General Hospital               | Boston, Massachusetts, United States     | CPET core laboratory staff                              |                                                                                            |  |  |  |  |
| Ilya                              | Giverts        |                       | MD               | Division of Cardiology, Department of Medicine, Massachusetts General Hospital               | Boston, Massachusetts, United States     | CPET core laboratory staff                              |                                                                                            |  |  |  |  |
| Catherine                         | Griskowitz     |                       | BS               | Division of Cardiology, Department of Medicine, Massachusetts General Hospital               | Boston, Massachusetts, United States     | CPET core laboratory staff                              |                                                                                            |  |  |  |  |
| Chloe                             | Newlands       |                       | MS               | Division of Cardiology, Department of Medicine, Massachusetts General Hospital               | Boston, Massachusetts, United States     | CPET core laboratory staff                              |                                                                                            |  |  |  |  |
| Fabely Moreno                     | Moreno         |                       | BS               | Division of Cardiology, Department of Medicine, Massachusetts General Hospital               | Boston, Massachusetts, United States     | CPET core laboratory staff                              |                                                                                            |  |  |  |  |

Supplemental Online Content: Nonauthor Collaborators

\*Indicates required information. Only first name, last name, and suffix will appear in PubMed.

| <b>*First Name and Middle Initial(s)</b> | <b>*Last Name</b> | <b>*Suffix (eg, Jr, III)</b> | Academic Degrees | Institution | Location (city, state/province, country) | Role or Contribution, eg, chair, principal investigator | Group (if more than 1 Group listed in the byline) and/or Subgroup (eg, Steering Committee) |  |  |  |  |
|------------------------------------------|-------------------|------------------------------|------------------|-------------|------------------------------------------|---------------------------------------------------------|--------------------------------------------------------------------------------------------|--|--|--|--|
|                                          |                   |                              |                  |             |                                          |                                                         |                                                                                            |  |  |  |  |
|                                          |                   |                              |                  |             |                                          |                                                         |                                                                                            |  |  |  |  |
|                                          |                   |                              |                  |             |                                          |                                                         |                                                                                            |  |  |  |  |
