# Supplementary material for: Aficamten and Cardiopulmonary Exercise Test Performance: A Substudy of the SEQUOIA-HCM Randomized Clinical Trial
Source: PubMed Central journal article supplement — JAMA Cardiol. 2024 Sep 4;9(11):990–1000. doi: 10.1001/jamacardio.2024.2781 (PMC11375526; doi:10.1001/jamacardio.2024.2781), 2024-09-04
Supplement: jamacardiol-e242781-s005.pdf [file jamacardiol-e242781-s005.pdf]

## Data Sharing Statement

Lee MMY. Aficamten and cardiopulmonary exercise test performance: a substudy of the SEQUOIA-HCM randomized clinical trial. *JAMA Cardiol*. Published online September 4, 2024. doi:10.1001/jamacardio.2024.2781

### Data

**Data available:** Yes

**Data types:** Other (please specify)

**Additional Information:** Qualified researchers may submit a request containing the research objectives, endpoints/outcomes of interest, statistical analysis plan, data requirements, publication plan, and qualifications of the researcher(s). Requests are reviewed by a committee of internal and external advisors. If approved, data necessary to address the research question will be provided under the terms of data sharing agreement. Requests will be considered after applications for marketing authorization in the US and Europe have been reviewed and final decisions rendered.

**How to access data:** Requests may be submitted to [medicalaffairs@cytokinetics.com](mailto:medicalaffairs@cytokinetics.com)

**When available:** beginning date: 10-01-2026

### Supporting Documents

**Document types:** None

### Additional Information

**Who can access the data:** Qualified researchers may submit a request containing the research objectives, endpoints/outcomes of interest, statistical analysis plan, data requirements, publication plan, and qualifications of the researcher(s).

**Types of analyses:** For specified purposes

**Mechanisms of data availability:** This will be decided on a case by case basis
